# Simultaneous Dual Optical Mapping of the Heart Using a Single Excitation, Single Camera Approach

Rafael Jaimes III<sup>1,2</sup> ([rjaimes@childrensnational.org](mailto:rjaimes@childrensnational.org)), Damon McCullough<sup>1</sup> ([dmcculloug@childrensnational.org](mailto:dmcculloug@childrensnational.org)), Bryan Siegel<sup>2</sup> ([bsiegel@childrensnational.org](mailto:bsiegel@childrensnational.org)), Luther Swift<sup>1,2</sup> ([lsswift2@childrensnational.org](mailto:lsswift2@childrensnational.org)), James Hiebert<sup>1</sup> ([jhiebert1691@gmail.com](mailto:jhiebert1691@gmail.com)), Daniel McInerney<sup>1</sup> ([dmcinerney21@gmail.com](mailto:dmcinerney21@gmail.com)), Nikki Gillum Posnack ([nposnack@childrensnational.org](mailto:nposnack@childrensnational.org))<sup>1,2,3</sup>

<sup>1</sup>Sheikh Zayed Institute for Pediatric and Surgical Innovation: Children's National Health System, 111 Michigan Avenue NW, Washington DC 20010

<sup>2</sup>Children's National Heart Institute: Children's National Health System, 111 Michigan Avenue NW, Washington DC 20010

<sup>3</sup>Department of Pediatrics, Department of Pharmacology & Physiology, School of Medicine and Health Sciences: George Washington University, 2300 I Street NW, Washington DC 20037

## Corresponding Author:

Nikki Gillum Posnack, Ph.D.  
Sheikh Zayed Institute, 6<sup>th</sup> floor, M7708  
111 Michigan Avenue, NW  
Washington, DC, USA 20010  
Tel: (202) 476-2475  
Email: [nposnack@childrensnational.org](mailto:nposnack@childrensnational.org)

**Running title:** Dual optical mapping

# ABSTRACT

**Background:** Optical mapping of transmembrane voltage and intracellular calcium is a powerful tool for investigating cardiac physiology and pathophysiology. Until recently, the assembly and implementation of simultaneous dual mapping of two fluorescent probes has been technically challenging. We introduce a novel, easy-to-use platform that requires only a single camera and single excitation light to simultaneously acquire voltage and calcium signals from whole heart preparations, which can be expanded and applied to other physiological models – including neurons and isolated cardiomyocytes.

**Results:** Complementary probes were selected that could be excited with a single wavelength light source. Langendorff-perfused hearts (rat, swine) were stained and then imaged using a sCMOS camera outfitted with an optical path splitter to simultaneously acquire two emission fields at high spatial and temporal resolution. Voltage (RH237) and calcium (Rhod2-AM) signals were acquired concurrently on a single sensor, resulting in two 384x256 images at 814 frames per second. At this frame rate, the signal-to-noise ratio was 47 (RH237) and 85 (Rhod-2AM). In separate experiments, each dye was used independently to assess crosstalk and demonstrate signal specificity. Additionally, the effect of ryanodine on myocardial calcium transients was validated – with no measurable effect on the amplitude of optical action potentials. To demonstrate spatial resolution, ventricular tachycardia was induced and spatially discordant alternans were noted in different regions of the heart.

**Conclusions:** We present and validate a dual imaging approach that eliminates the need for multiple cameras, excitation light patterning or frame interleaving. This imaging platform is comprised entirely of off-the-shelf components, has minimal engineering complexity, and utilizes readily available fluorescent probes. These key features can aid in the adoption of dual mapping technology by the broader cardiovascular research community, and decrease the barrier of entry into panoramic heart imaging, as it reduces the number of required cameras.

## Keywords:

Optical mapping, calcium cycling, transmembrane voltage, electrophysiology

## **BACKGROUND**

Cardiovascular research has been propelled by the advent of parameter-sensitive probes, which can be used to monitor transmembrane voltage and intracellular calcium within live cardiac preparations(1–5). Optical mapping is an imaging technique that measures fluorescence signals across a cardiac preparation with high spatiotemporal resolution. Optical mapping of voltage-sensitive probes(6–8) allows for the measurement of action potential morphology and the spread of electrical activity, as well as the identification of tissue heterogeneities that can promote arrhythmias. Whereas intracellular calcium probes(9) are used to investigate modifications in excitation-contraction coupling, which can alter action potential duration, elicit after-depolarizations, and promote electrical/mechanical alternans. Accordingly, simultaneous imaging of both transmembrane voltage and intracellular calcium is a powerful integrative tool for cardiac research (for extensive reviews see(1–4)). Yet, assembling a dual optical mapping system remains technically challenging(4,10,11), which can limit the use of this technique to a relatively small number of research laboratories.

Simultaneous dual mapping systems have traditionally used a dual-sensor design, wherein the emission of each complementary probe (voltage, calcium) is separated by wavelength and diverted to two separate detectors(1,5,12–16). Such a design was described by Fast and Ideker, in which cardiomyocytes monolayers were stained with complementary probes (RH237 – voltage, Fluo-3AM – calcium) and the emitted fluorescent signals were focused onto two 16x16 photodiode arrays(15). A similar approach was employed by Choi and Salama to simultaneously record transmembrane voltage (RH237) and intracellular calcium (Rhod-2AM) signals from isolated, whole guinea pig hearts(13). Subsequently, dual-sensor optical configurations have been expanded to include EMCCD and sCMOS sensors with superior spatial resolution(4,5,17). RH237/Rhod-2AM probes are still commonly used for dual imaging(1,18–22), although dual-dye combinations that separate fluorescence signals by emission have also been developed. They include: Di-4-ANEPPS with Indo-1(16), Di-2-ANEPEQ and Calcium green(23), and RH237 with Fluo-3/4/5N(12,15,24,25). Importantly, these dye combinations can have spectral overlap, necessitate non-ideal emission bandpass to negate spectral overlap, and/or include a calcium probe with an inferior dissociation constant(26). A dual-sensor optical mapping system offers many advantages, including the full spatial and temporal resolution of each individual camera. However, a dual-camera optical setup can be both technically challenging and cost-prohibitive for basic-science and teaching laboratories(3,4,10,11). Dual-sensor systems also require proper alignment to ensure that fluorescence signals are being analyzed from the same tissue region on each individual detector, which could lead to erroneous results. Finally, the physical footprint of two cameras in a 90 degree orientation can be limiting and reduce its versatility.

## Dual optical mapping

An alternative optical mapping approach includes the use of a single sensor to sequentially image each complementary probe (voltage, calcium) in time using excitation light patterning(10,11,27,28) (see Table 1). A single-sensor, sequential imaging approach was described by Lee et al., which achieved rapid excitation light switching by utilizing recently developed high-power light emitting diodes(10). Accordingly, single-sensor designs use dual-dye combinations that require two (or more) excitation light sources, but share a single emission band, including: di-4-ANBDQPQ and Fura-2(10) or Rhod-2AM(29), Di-4-ANBDQBS and Fluo-4(28), or Di-4-ANEPPS and X-Rhod-1(11) (for review see(26)). Single-sensor optical mapping systems offer a cost advantage, since the camera sensor is often one of the most expensive components of an optical mapping setup. However, a single-sensor platform design can be more technically challenging since the use of two different excitation light wavelengths necessitates light source triggering, camera synchronization and frame interleaving(10,27,28). A microcontroller is typically used to properly time light triggering and to coordinate image acquisition, since each (alternating) probe signal is acquired in sequential frames. This alternating configuration decreases the frame rate for each fluorescent probe of interest, since voltage/calcium signals typically reside on odd/even images. Excitation light ramp up/down times and shutter open/close times also have to be taken into consideration to avoid overlap. Accordingly, single-sensor setups (with interleaved frames per dye of interest) necessitate shortened exposure times compared with dual-sensor setups. The latter can diminish signal-to-noise quality, without offering the same temporal fidelity.

To expand dual imaging methodology to the broader cardiovascular research community, we built upon the advantages of previously developed platforms while minimizing technical challenges. We present a novel dual imaging setup that employs a single-sensor and single-excitation light source to simultaneously acquire voltage and calcium signals using an optical path splitter (Figure 1,2). Specifically, we have taken advantage of recently developed large field of view sCMOS sensors that are faster and more sensitive (2048 x 2048 pixels, 18.8 mm diagonal, Zyla 4.2 plus, Andor Technology PLC, Belfast, UK). Like previously designed dual-sensor systems(5,13), our configuration requires an optical path splitter to separate the two emission bands for Rhod-2AM and RH237. However, we negate the need for a bulkier footprint and costly two camera setup by simultaneously directing each emission band to different sides of the single, large camera sensor. Optical path splitters are typically used in microscopy applications that employ immunolabeled samples; however, such an approach has not yet been described for multiparametric imaging of live cardiac preparations that require 1) fast acquisition speeds, 2) high spatial resolution, and 3) utilize fluorescent probes with low fractional change.

Notably, the described approach enables truly simultaneous dual imaging of cardiac preparations, while eliminating the need for two cameras and/or multiple excitation light sources, light patterning and frame interleaving. The described imaging platform is composed entirely of off-the-shelf components, which can aid in the adoption and successful assembly of this setup by other laboratories. The described protocol also employs a commonly used dual-dye combination (RH237, Rhod-2AM) that is widely available, thereby negating the need for genetically-encoded indicators(30–32) or fluorescent probes that are not yet commercially available(33,34). We validate the utility of our approach by performing high-speed simultaneous dual imaging with sufficient signal-to-noise ratio for calcium and voltage signals, specificity of emission signals with negligible cross-talk, and spatiotemporal resolution during both external pacing and ventricular tachycardia. For proof-of-concept, we highlight the versatility of our imaging platform by seamlessly maneuvering our optical setup between a Langendorff-perfused rat heart setup (2-3 cm in length, laying down) and Langendorff-perfused piglet heart setup (5-8 cm in length, suspended) with different orientations.

## RESULTS

### Demonstration of distinct optical emission paths

Multiparametric imaging depends upon negligible cross-talk between probes, since interference between two fluorescent dyes can lead to erroneous calculations from the acquired signals. Lack of optical crosstalk along the light path was evaluated using a blanking plate, which was used to block either the short/585nm light path or long/710nm light path (Figure 2D). To test for potential dye crosstalk, experiments were performed in which Langendorff-perfused rat hearts were loaded with a single fluorescent probe (Rhod-2AM or RH237), and the degree of cross-talk between the two optical paths was assessed independently (Figure 2E, F). Representative optical signals recorded after staining with Rhod-2AM are shown in Figure 2E. Note that calcium transients are distinctly visualized with no detectable signal in the 710 nm long-pass channel (RH237 channel). Conversely, staining with RH237 only resulted in robust voltage signals with negligible signal in the 585/40 nm channel (Rhod-2AM channel) with only a small max amplitude of <3 counts (Figure 2F). There was no detected fluorescence from Rhod-2 on the 710 nm long pass channel ( $0 \pm 0$  counts) compared to the maximum of  $17 \pm 1$  counts on the 585 nm centered channel ( $p < 0.0001$ ). With RH237 staining only, there was an average maximum of  $37 \pm 5$  counts compared to the  $2 \pm 1$  counts on the 710 nm longpass and 585 nm centered band, respectively,  $p < 0.0001$ ). These tests demonstrate that RH237 and Rhod2-AM signals selectively correspond to transmembrane voltage and intracellular calcium, respectively, with minimal cross-talk between the two probes. The latter is comparable to previously reported dual-sensor configurations(5,13).

### Use of ryanodine receptor antagonist to demonstrate signal specificity

## Dual optical mapping

Ryanodine, a ryanodine receptor antagonist, is known to significantly impact intracellular calcium transients(35) triggered by action potentials, with minimal effect on action potential morphology(13). To further demonstrate signal specificity, a subset of experiments were performed on juvenile rats to illustrate the effect of ryanodine on calcium transient versus action potential characteristics (Figure 3). As anticipated, ryanodine-supplementation resulted in a marked reduction in the calcium transient peak amplitude by 60% (Figure 3A,C) with no effect on action potential amplitude (Figure 3B,D). Also expected(36), ryanodine-treatment lengthened both the calcium transient duration by 42% (CaD80, Figure 3G) and the action potential duration by 40% (APD80, Figure 3H). This study further demonstrates the specificity of our optical configuration, and that the acquired RH237 and Rhod2-AM signals are accurately separated.

## Simultaneous optical mapping of transmembrane voltage and intracellular calcium

Experimental studies were performed to demonstrate the spatiotemporal performance of our optical mapping system, with suitable signal-to-noise ratio (SNR) for simultaneous dual mapping. Langendorff-perfused rat (2-3 cm length, laying down) or piglet hearts (5-8 cm length, suspended) were loaded with both fluorescent probes (RH237, Rhod-2AM) and optical signals were acquired concurrently (Figure 4). Dye loading can be quickly verified by measuring regions on either image without de-interlacing, which is necessary with other single sensor systems. Following image acquisition (1msec exposure time, 1000 fps, 768x208), optical signals were spatially averaged using a pixel radius of 30 for SNR measurements. These acquisition settings resulted in a SNR of 74 for Rhod-2AM and 39 for RH237. A slight increase in the exposure time (1.2 msec, 814 fps, 768x256) improved the SNRs to 85 for Rhod-2AM and 47 for RH237 (see Supplemental Table 2 for SNR calculations). In comparison, when the exposure time was doubled (2 msec, 500 fps, 768x384), the SNR improved to 121 for Rhod-2AM and 58 for RH237.

Examples of voltage and calcium signals acquired simultaneously from an isolated rodent heart are shown in Figure 4A, and in Supplemental video 1 & 2. As expected, action potential activation preceded calcium transients for all pacing rates (150, 200, 220 msec cycle length). To demonstrate the versatility of our optical mapping system, supplementary studies were performed on isolated piglet hearts that were imaged in an upright and suspended orientation (180, 200, 220 msec cycle length, Figure 4B, Supplemental video 3 & 4). These experimental studies highlight the utility of our setup for simultaneous transmembrane voltage and intracellular calcium recordings of cardiac preparations, with excellent SNR and temporal resolution.

## Requisite spatiotemporal resolution for whole heart optical mapping



## Dual optical mapping

To demonstrate spatiotemporal resolution of our optical mapping system, we assessed excitation-contraction coupling and measured epicardial conduction velocity. Calcium and voltage images were briefly processed by convolution with a uniform kernel for box blurring of increasing size (Figure 5A-H), as previously described(37). The blurring process decreased salt and pepper noise and improved the overall quality of isochronal maps and videos with minimal effect on spatial resolution (Figure 5I). Box blurred images were used for subsequent image analysis, such as conduction velocity measurements (Figure 6A-D). Calcium and voltage signals were acquired with high temporal resolution upstrokes (Figure 6C), and as expected, isochrones show an elliptical pattern of action potential activation and calcium release that originated at the pacing site (Figure 6A, B). A shorter time delay was observed between voltage and calcium signals at the apex of the heart compared with the base (Figure 6C) - an anatomical difference in excitation-contraction coupling that has previously been described(13). Notably, apex-to-base differences can result in slower conduction velocity measurements when calcium measurements are used as a surrogate for voltage wavefront velocity in isolated whole heart preparations (Figure 6D), as compared to cell monolayer preparations(11,38).

As an example, an isolated rat heart preparation is shown wherein longitudinal voltage conduction velocity was  $67 \pm 4.6$  cm/sec compared to the  $45 \pm 2.0$  cm/sec for calcium (Figure 6). Transverse voltage and calcium velocities were  $41 \pm 2.3$  and  $34 \pm 1.6$  cm/sec. In this example, spatial heterogeneity was readily observed as the anisotropic ratio (longitudinal/transverse) was 1.62 for voltage conduction velocity, compared to 1.32 for calcium velocity, which illustrates discontinuity in wavefront propagation (Figure 6E,F). Indeed, viewing the time course of the voltage and calcium activation patterns of this heart pinpointed the activity in left, basal region. At  $t=40$  msec, an area showed a discontinuity activation/repolarization pattern (Figure 6E), with a wavebreak clearly visible on the calcium channel (Figure 6F). This anatomical region was consistent with the increased lag of the calcium release following depolarization, and may suggest underlying myocardial damage. Indeed, the described imaging platform provides sufficient spatial resolution to visualize the spread of electrical activity and calcium cycling in cardiac preparations.

### Induction of cardiac alternans to demonstrate spatial resolution

Arrhythmias are relatively uncommon in the rodent heart under basal conditions, due to species differences in cardiac size and ion channel expression(39). Therefore, a burst pacing protocol was employed to induce ventricular tachyarrhythmias for subsequent pathophysiological imaging. Following burst pacing, concordant alternans were readily observed, wherein an alternating rhythm was observed in the action potential duration and/or intracellular calcium concentration(40–43) (data not shown). Alternans can be detected as T-wave alternans on an electrocardiogram (Figure 7A), or identified optically, from voltage and/or calcium signals acquired from a single region of interest (Figure 7B-G).

Conversely, discordant alternans arise when alternating rhythms in different spatial regions are out of phase. Such heterogeneities can be identified with optical mapping of fluorescence signals from multiple sites across a cardiac preparation with high spatiotemporal resolution(44). One such example is shown in Figure 7, in which ventricular tachycardia was encountered concomitantly with spatially discordant calcium transient alternans following dynamic pacing (S1-S1, 70 msec cycle length, isolated rat heart). With higher spatiotemporal resolution than previously reported (Table 1), different tissue regions can be identified and investigated using the described single-sensor setup.

Studies suggest that calcium alternans are mechanistically responsible for action potential duration alternans(45), however the association has not been fully elucidated. Depending on the underlying condition and cellular function, two different variants of alternans can manifest. “Positive coupling” describes the scenario in which a small calcium transient amplitude occurs after a shortened action potential(41). Conversely, “negative coupling” describes a tall calcium transient amplitude that is associated with a shortened action potential. In the current study, we show examples of both positive and negative electromechanical coupling (in- and out-of-phase, respectively, Figure 7E,F). Although calcium transient amplitudes were spatially discordant, action potential duration remained concordant. The described system excels in providing both a wide field of view and high spatial resolution, which facilitated the detection of discordant alternans. Importantly, discordant alternans are considered a precursor for reentry arrhythmias(40), as repolarization gradients become amplified when neighboring cells are out of phase(40,42).

## **DISCUSSION**

In the current study, we present a novel dual mapping system that employs recent advancements in imaging technology. Key advantages include the simplicity of construction (single sensor, single light), the elimination of artifacts common for dual light sources and dual camera designs, use of optically compatible dyes, and reduced cost barrier. This dual mapping platform does not require the coordination of exposure frame rate and LED light triggering, which can be technically challenging and also divides the acquisition frame rate by the number of probes (e.g. dual mapping calcium and voltage would otherwise decrease the effective frame rate by 50%). With this configuration, individual images of calcium or voltage are each acquired, simultaneously, at 384x256 resolution at 814 fps. If necessary for a specific application, the acquisition rate can be increased with vertical cropping or the field of view can be expanded to decrease the frame rate, all while maintaining SNR for the detection of calcium and voltage signals.

We validated the spatial and temporal performance of our optical mapping system using isolated whole rat and piglet hearts. Proof-of-principle experiments were performed to measure optical action



potentials and calcium transients, spatial distribution of excitation-contraction coupling, conduction velocity measurements in transverse/longitudinal directions, and spatiotemporal resolution of electrical and mechanical alternans. Importantly, accurate separation of transmembrane voltage and calcium signals was shown with single-dye loading experiments and also by application of ryanodine. In the latter, ryanodine administration decreased calcium transient amplitude – with no discernible effect on action potential amplitude(13). We also demonstrated that a larger heart size (piglet, 5-8 cm length) could be accommodated without sacrificing acquisition speed by using wider strips (1024x256) and/or utilizing a wide-angle lens. Notably, the described system has a small footprint that expands its versatility of use between cardiac preparations of different size and orientation. The system configuration can also be outfitted with other camera models to achieve specific temporal and spatial resolution needs. As an example, the N256 camera (SciMedia, Costa Mesa, CA) has a 256x256 sensor at a frame rate of 1818 fps, which could result in dual 256x128 images using the described configuration. Finally, the described approach reduces the investment for a panoramic imaging setup(46–48) by decreasing the total number of required cameras.

One limitation of our approach is the sensitivity of the front-illuminated sCMOS sensor, which peaks at 82% quantum efficiency, but has a roll-off at 700 nm, in the emission spectrum of RH237. We see this limitation as an acceptable trade-off compared to the increased speed that the camera provides compared to back-illuminated options. We did not characterize the loss in quantum yield from the optical path splitter, though we anticipate losses that are comparable to other dichroic based emission splitting systems. The optical path was optimized by using high transmission band (>95%) filters and a high-speed lens (f/0.95 or f/1.4). Another potential limitation of the camera is the small pixel size of 6.5  $\mu\text{m}$ , which is not necessarily required for applications at the tissue level, such as whole heart preparations. We have mitigated the small pixel size by employing box blur algorithms during post-acquisition processing when necessary to improve signal fidelity (binning could also be used). A single excitation light source, single camera platform can complicate the control of dual emission intensities; although we did not encounter this problem due to the similar SNR of the dyes and wide (16-bit) dynamic range of the camera. Finally, a slight difference in the focal plane between 585nm versus 710nm can occur due to chromatic focal shift – although this did not impact fluorescence signals at the tissue level. Color-corrected lenses can be employed to minimize chromatic aberration.

## **CONCLUSION**

To minimize technical challenges associated with dual imaging, we developed a novel platform to simultaneously acquire voltage and calcium signals from cardiac preparations using a single camera and single excitation light. Notably, the described platform is composed entirely of off-the-shelf components, which can aid in the adoption and successful implementation of this setup by other

laboratories. The described protocol also employs a readily available dye combination (RH237, Rhod-2AM), thereby negating the need for genetically-encoded indicators or fluorescent probes that are not commercially available. As proof-of-principle, we confirm the specificity of our emission signals with negligible cross-talk and demonstrate high spatiotemporal resolution for excitation-contraction coupling, conduction velocity, and concordant/discordant alternans research. The described platform is easy to align and has a small footprint, which provides flexibility in its use for tissue preparations of varying size and/or orientation. In summary, the described platform requires minimal technical complexity, yet provides the spatiotemporal resolution and signal-to-noise ratio necessary for the investigation of voltage/calcium kinetics, conduction velocity and arrhythmia incidence.

## **METHODS**

### Isolated rodent heart preparation

Animal procedures were approved by the Institutional Animal Care and use Committee of the Children's Research Institute, and followed the National Institutes of Health's *Guide for the Care and Use of Laboratory Animals*. Unless otherwise noted, experiments were conducted using adult male Sprague-Dawley rats (2-3 months of age, 250-350g, n=11, Taconic Biosciences). Animals were anesthetized with 3-5% isoflurane, the heart was excised and then transferred to a temperature-controlled (37°C) constant-pressure (70 mmHg) Langendorff perfusion system. Excised hearts were perfused with Krebs-Henseleit buffer throughout the duration of the experiment, as previously described (<1 hour)(12,49,50). Three electrodes were positioned to acquire a far-field electrocardiogram in the lead II configuration. In a subset of experiments, male juvenile rats (postnatal day 5, 10 grams, n=6) were used to demonstrate the effects of ryanodine-supplementation on electromechanical coupling.

### Isolated piglet heart preparation

Animal procedures were approved by the Institutional Animal Care and use Committee of the Children's Research Institute, and followed the National Institutes of Health's *Guide for the Care and Use of Laboratory Animals*. Yorkshire piglets (2-4 weeks of age, n=4) were used in a supplementary study to demonstrate the versatility of the optical setup. Briefly, an intravenous bolus injection of fentanyl (50µg/kg) and rocuronium (1mg/kg) was administered, and anesthesia was maintained with isoflurane (1-3%), fentanyl (10-25µg/kg) and pancuronium (1mg/kg). The heart was excised and submerged in cardioplegia (4°C) and then flushed with Krebs-Henseleit solution by aortic cannulation. The heart was transferred (~10 minutes at room temperature) to a temperature-controlled (37°C) constant-pressure (70 mmHg) Langendorff-perfusion system. To avoid ischemic-injury in these larger tissue preparations, the heart was suspended in contrast to the "laying" rat heart. Accordingly, the dual mapping platform (camera, path splitter) was relocated in proximity to the larger capacity perfusion system.

## Dual optical mapping

Once a baseline heart rate was established (10 min), the perfusate was supplemented with 10  $\mu$ M (-/-) blebbistatin (Sigma-Aldrich) to reduce motion artifact for subsequent imaging experiments(51,52). Fluorescent dyes were added sequentially, as a bolus, through a bubble trap located proximal to the aortic cannula. Based on predetermined myocardial staining time for each dye, 50  $\mu$ g Rhod-2AM(1,49) was added first and allowed to stabilize for 10 min, followed by 62.1  $\mu$ g RH-237 staining for 1 min(12). The myocardial tissue was re-stained by RH237 if needed throughout the duration of the experiment(53). For electrical stimulation, a coaxial stimulation electrode was positioned on the ventricular epicardium, which was driven by a Bloom Classic electrophysiology stimulator (Fischer Medical). Pacing current was set to 1.5x the threshold (resulting in typically 1.8 mA), with 1 msec monophasic pulses.

## Ryanodine administration

To demonstrate negligible cross-talk between voltage and calcium signals, a subset of experiments was performed in the presence of ryanodine (n=3). Ryanodine has previously been shown to selectively affect calcium transient upstroke and amplitude(13). 10  $\mu$ M ryanodine was added as a bolus, through a bubble trap located proximal to the aortic cannula. Hearts were subjected to continuous pacing during imaging (180 msec), and images were captured before and immediately after application of ryanodine (30 seconds, 1 and 3 minutes).

## Instrumentation

The overall system configuration is shown in Figure 1. The epicardium was illuminated using broad light emitting diode (LED) spotlights centered at 530 nm (Mightex), equipped with an optical filter to constrict the excitation band (ET530/40x nm, Chroma Technologies). LED radiant power varied between 50 – 200 mW, as needed. At the onset of imaging, the excitation LEDs were automatically enabled via a direct TTL connection from the camera output. Due to the use of a single light source for excitation, complex light triggering was not needed to coordinate alternating LED light sources with individual frames.

An image splitting device (OptoSplit II, Cairn Research, Ltd) was positioned in front of a sCMOS camera (Andor Technology, PLC, Zyla 4.2 PLUS); the corresponding light path is shown in Figure 1B. The beam splitter was configured with a dichroic mirror (660+nm, Chroma Technologies, see Supplemental Table 1) that passed RH237 emission and reflected Rhod-2AM fluorescence. High transmission emission filters were used for Rhod2-AM (ET585/40m, Chroma Technologies) and RH237 emitted light (long pass ET710, Chroma Technologies). A fixed focal length 17mm/F0.95 lens was attached to the front of the imaging splitting device (Schneider, #21-010456) for rat hearts, and a wide-

## Dual optical mapping

angle 6mm/F1.2 lens (Fujinon, #DF6HA-1B) was used for pig hearts. Details of the optical configuration are shown in Figure 1B,C and the experimental workflow is displayed in Figure 1D.

*MetaMorph* v7.10.2.240 (Molecular Devices, LLC) was used for camera configuration, optosplit image alignment and LED on/off triggering. To guide manual optosplit alignment, *MetaMorph* overlays the live images as contrasting colors or as subtractive greyscales to highlight misalignment. With this live feedback, images are quickly aligned (<1 minute) using the optosplit's "long" and "short" control knobs (Figure 2). As an alternative to *MetaMorph*, images could also be aligned with the free software *μManager* (54). After alignment, any standard image acquisition software can be used such as *MetaMorph*, *μManager*, or *Solis* (Andor Technologies, software supplied with camera). The acquired image will include two fields, which can be separated using *MetaMorph*, *μManager*, or alternative imaging software that includes automated tools. LEDs were attached to a controller (SLC-SA04-U/S, Mightex) that was triggered "on" 1 second prior to image acquisition. The computer consisted of a Xeon CPU E3-1245 v5 3.50 GHz (Intel corporation), 32 GB of RAM, and a non-volatile memory express solid state disk (NVMe SSD, Samsung 960 Pro). A frame grabber was used for imaging control and acquisition (Karbon #KBN-PCE-CL4-F, BitFlow). Because of the high data rate of acquisition (due to high spatial and temporal resolution and bit depth), the NVMe SSD disk was essential for reducing data rate bottlenecks. The frame grabber with 10-tap CameraLink™ connection was necessary to achieve the fastest frame rates possible; a USB connection would result in much slower frame rates.

To maximize spatiotemporal resolution, the sCMOS camera sensor was cropped and set to an acquisition rate of 814 frames per second (fps). The exposure time to achieve this frame rate was 1.206 msec, with a 98.4% duty cycle. This configuration resulted in two images from the splitting device, each 384x256 pixels, with a 16 pixel boundary between each image to negate optical crosstalk (Figure 2D). The field of view was approximately 2.1 x 1.4 cm, which was sufficient to fully image pediatric rat hearts (0.3 g average weight, 1.7 cm length from aortic root to apex). For the larger adult rat hearts (1 g average weight, 2.7 cm in length), the field of view was extended by increasing the working distance. The actual pixel size on the sensor is 6.5 μm with a projected pixel size typically 45-80 μm – depending on working distance and field of view from a given lens. The front of the image splitter is a standard C-mount, which allows a user to select any standard lens to use in combination with accessories (back extension tubes, diopters) to adjust field of view and working distance. The projected pixel size was measured for each study and individually calibrated for conduction velocity measurements. If needed, the frame rate could be increased further by vertical cropping; the feasibility of which was tested with 208 vertical pixels at 1000 fps, which resulted in adequate SNR on the epicardial surface (see results section for details). For supplemental piglet heart studies (80-120 g average weight, 5-8 cm length), a

wide-angle lens was used in conjunction with a larger area of the sensor to attain a field of view approximately 5.9 x 4.7 cm.

### Signal and image processing

Following image acquisition, signal or image processing was performed as outlined in Figure 1D. Signal processing and data analysis were performed using a custom MATLAB script(26,50). A circular region of interest was taken in the center of the raw image with a 30-pixel radius (5-20 mm<sup>2</sup> area on the heart, depending on lens), averaged, and plotted against time. Drift removal and temporal smoothing were applied when necessary. Drift removal was performed by subtraction of a polynomial fit (0<sup>th</sup>, 1<sup>st</sup>, or 2<sup>nd</sup> order). To remove high frequency noise, a 5<sup>th</sup> order Butterworth low-pass filter was applied to the resulting signals with a cut-off frequency adjusted between 50-150 Hz. After pre-processing, a peak detector was used to measure the total number of action potentials or calcium transients in the file across time. Characteristics from each event are measured and averaged, including action potential duration, calcium transient duration, time to 90% peak, and amplitude as described previously(26,49,55,56).

Image processing was performed and isochrone maps were constructed in the *rhythm* software(37). The background was removed, convolved with a 15x15 uniform kernel for box blurring(37) and then time signals were low-pass filtered below 100 Hz. The activation time of every pixel on the heart was defined as the maximum derivative of the action potential or transient upstroke, which was plotted for both voltage and calcium, respectively. As proof of concept, we also tested the feasibility of measuring conduction velocity across the epicardial surface by exporting the activation maps and analyzing via ORCA(57). Subsequent electrical wave propagation images were constructed using custom Python scripts and plotted with matplotlib(58). Briefly, the images underwent an edge detection procedure to remove the background, box blurred by a 15x15 uniform kernel, and then normalized. Signal-to-noise ratio (SNR) of the time-series was calculated as the action potential amplitude ( $\Delta F$ ) over the standard deviation of the baseline during the diastolic interval(59). The number of pixels used to calculate the SNR was noted when necessary; importantly, the SNR can be improved considerably after box blurring and/or spatial averaging.

### Statistical analysis

Statistical tests were performed using the R software package. Datasets from the ryanodine experiments were compared pairwise using Welch's T-test and significance reported as  $p < 0.05$ .

### **ABBREVIATIONS**

APD<sub>30</sub>            action potential duration at 30% repolarization

|     |                   |                                              |
|-----|-------------------|----------------------------------------------|
| 449 | Ca                | intracellular calcium signal                 |
| 450 | CaD <sub>30</sub> | calcium transient duration at 30% relaxation |
| 451 | MEHP              | mono-2-ethylhexyl phthalate                  |
| 452 | Rr                | ryanodine                                    |
| 453 | SNR               | signal to noise ratio                        |
| 454 | Vm                | transmembrane voltage                        |

455

## 456 **DECLARATIONS**

457 Ethics approval and consent to participate: Animal procedures were approved by the Institutional  
 458 Animal Care and use Committee of the Children's Research Institute, and followed the National  
 459 Institutes of Health's *Guide for the Care and Use of Laboratory Animals*.

460 Consent for publication: Not applicable

461

462 Availability of data and material: All data generated or analyzed during this study are included in this  
 463 published article and the supplementary information files.

464

465 Competing Interests: The authors declare that they have no competing interests.

466

467 Funding: This work was supported by the National Institutes of Health (R00ES023477 to N.G.P,  
 468 R01HL139472 to N.G.P), Children's Research Institute and Children's National Heart Institute. We  
 469 thank the generosity of the NVIDIA corporation for the graphics processing unit to perform CUDA-  
 470 enabled image processing. Funding sources had no role in the design of the study, collection, analysis,  
 471 interpretation of the data or writing the manuscript.

472

473 Author contributions: RJ, DM, BS, LS, JH, DM, NGP performed experiments; RJ, DM, BS, NGP  
 474 analyzed data; RJ, DM, NGP prepared figures; RJ and NGP drafted manuscript, RJ and NGP  
 475 conceived and designed experiments; RJ, DM, BS; LS, JH, DM and NGP approved manuscript.

476

477 Acknowledgements: The authors gratefully acknowledge Narine Sarvazyan, Charles Berul, and Yu-Ling  
 478 Shao for helpful discussions, Manelle Ramadan and Morgan Burke for technical assistance, and  
 479 Nobuyuki Ishibashi and Takuya Maeda for biological materials.

480

## 481 **REFERENCES**

- 482 1. Lang D, Sulkin MS, Lou Q, Efimov IR. Optical Mapping of Action Potentials and Calcium  
 483 Transients in the Mouse Heart. J Vis Exp. 2011;(55).
- 484 2. Efimov IR, Nikolski VP, Salama G. Optical imaging of the heart. Circ Res. 2004 Jul;95(1):21–33.



*Dual optical mapping*

- 485 3. Herron TJ, Lee P, Jalife J. Optical imaging of voltage and calcium in cardiac cells & tissues. *Circ*  
486 *Res.* 2012 Feb;110(4):609–23.
- 487 4. Entcheva E, Bien H. Macroscopic optical mapping of excitation in cardiac cell networks with  
488 ultra-high spatiotemporal resolution. *Prog Biophys Mol Biol.* 2006 Oct;92(2):232–57.
- 489 5. Salama G, Hwang SM. Simultaneous optical mapping of intracellular free calcium and action  
490 potentials from langendorff perfused hearts. 2009/07/04. Vol. Chapter 12, *Current Protocols in*  
491 *Cytometry.* 2009. p. Unit 12 17-Unit 12 17.
- 492 6. Salama G, Morad M. Merocyanine 540 as an optical probe of transmembrane electrical activity in  
493 the heart. *Science. UNITED STATES;* 1976 Feb;191(4226):485–7.
- 494 7. Fluhler E, Burnham VG, Loew LM. Spectra, membrane binding, and potentiometric responses of  
495 new charge shift probes. *Biochemistry.* 1985 Oct;24(21):5749–55.
- 496 8. Efimov IR, Huang DT, Rendt JM, Salama G. Optical mapping of repolarization and refractoriness  
497 from intact hearts. *Circulation. Department of Cell Biology and Physiology, University of*  
498 *Pittsburgh, School of Medicine, PA 15261.;* 1994 Sep;90(3):1469–80.
- 499 9. Fabiato A, Fabiato F. Use of chlorotetracycline fluorescence to demonstrate Ca<sup>2+</sup>-induced  
500 release of Ca<sup>2+</sup> from the sarcoplasmic reticulum of skinned cardiac cells. *Nature.* 1979 Sep  
501 13;281(5727):146–8.
- 502 10. Lee P, Bollensdorff C, Quinn TA, Wuskell JP, Loew LM, Kohl P. Single-sensor system for  
503 spatially resolved, continuous, and multiparametric optical mapping of cardiac tissue. *Heart*  
504 *Rhythm.* 2011 Sep;8(9):1482–91.
- 505 11. Scull JA, McSpadden LC, Himel HD, Badie N, Bursac N. Single-detector simultaneous optical  
506 mapping of V(m) and [Ca(2+)](i) in cardiac monolayers. *Ann Biomed Eng.* 2012 May;40(5):1006–  
507 17.
- 508 12. Swift L, Martell B, Khatri V, Arutunyan A, Sarvazyan N, Kay M. Controlled regional hypoperfusion  
509 in Langendorff heart preparations. *Physiol Meas.* 2008 Feb;29(2):269–79.
- 510 13. Choi BR, Salama G. Simultaneous maps of optical action potentials and calcium transients in  
511 guinea-pig hearts: mechanisms underlying concordant alternans. *J Physiol.* 2000 Nov;529 Pt  
512 1(2000):171–88.
- 513 14. Atherton PJ, Babraj J, Smith K, Singh J, Rennie MJ, Wackerhage H. Selective activation of  
514 AMPK-PGC-1alpha or PKB-TSC2-mTOR signaling can explain specific adaptive responses to  
515 endurance or resistance training-like electrical muscle stimulation. *FASEB J. School of Life*  
516 *Sciences, University of Dundee, UK.;* 2005 May;19(7):786–8.
- 517 15. Fast VG, Ideker RE. Simultaneous optical mapping of transmembrane potential and intracellular  
518 calcium in myocyte cultures. *J Cardiovasc Electrophysiol. Department of Biomedical*  
519 *Engineering, University of Alabama at Birmingham, 35294, USA. fasst@crml.uab.edu;*  
520 2000;11(5):547–56.

# Dual optical mapping

- 521 16. Laurita KR, Singal A. Mapping action potentials and calcium transients simultaneously from the  
522 intact heart. Am J Physiol Hear Circ Physiol. The Heart and Vascular Research Center,  
523 MetroHealth Campus, Case Western Reserve University, Cleveland, Ohio 44109, USA.  
524 klaurita@metrohealth.org; 2001;280(5):H2053--60.
- 525 17. Omichi C, Lamp ST, Lin S-F, Yang J, Baher A, Zhou S, et al. Intracellular Ca dynamics in  
526 ventricular fibrillation. Am J Physiol Heart Circ Physiol. 2004 May;286(5):H1836-44.
- 527 18. Lang D, Holzem K, Kang C, Xiao M, Hwang HJ, Ewald GA, et al. Arrhythmogenic Remodeling of  
528 Beta2 Versus Beta1 Adrenergic Signaling in the Human Failing Heart. Circ Arrhythmia  
529 Electrophysiol. 2015 Feb;8(2):409--19.
- 530 19. Myles RC, Wang L, Kang C, Bers DM, Ripplinger CM. Local  $\beta\beta$ -Adrenergic Stimulation  
531 Overcomes Source-Sink Mismatch to Generate Focal Arrhythmia. Circ Res. 2012/04/28. 2012  
532 Apr;110(11):1454--64.
- 533 20. Lou Q, Li W, Efimov IR. Multiparametric Optical Mapping of the Langendorff-perfused Rabbit  
534 Heart. Journal of Visualized Experiments. 2011.
- 535 21. Holcomb MR, Woods MC, Uzelac I, Wikswo JP, Gilligan JM, Sidorov VY. The potential of dual  
536 camera systems for multimodal imaging of cardiac electrophysiology and metabolism. Exp Biol  
537 Med (Maywood). Department of Physics and Astronomy, Vanderbilt University, Nashville,  
538 Tennessee 37235-1807, USA.; 2009 Nov;234(11):1355--73.
- 539 22. Hwang G-S, Hayashi H, Tang L, Ogawa M, Hernandez H, Tan AY, et al. Intracellular Calcium  
540 and Vulnerability to Fibrillation and Defibrillation in Langendorff-Perfused Rabbit Ventricles.  
541 Circulation. 2006 Dec 12;114(24):2595--603.
- 542 23. Bullen A, Saggau P. Indicators and optical configuration for simultaneous high-resolution  
543 recording of membrane potential and intracellular calcium using laser scanning microscopy.  
544 Pflügers Arch Eur J Physiol. 1998 Aug 24;436(5):788--96.
- 545 24. Wang L, Myles RC, De Jesus NM, Ohlendorf AKP, Bers DM, Ripplinger CM. Optical mapping of  
546 sarcoplasmic reticulum Ca<sup>2+</sup> in the intact heart: ryanodine receptor refractoriness during  
547 alternans and fibrillation. Circ Res. 2014 Apr;114(9):1410--21.
- 548 25. Kong W, Walcott GP, Smith WM, Johnson PL, Knisley SB. Emission ratiometry for simultaneous  
549 calcium and action potential measurements with coloaded dyes in rabbit hearts: reduction of  
550 motion and drift. J Cardiovasc Electrophysiol. Department of Biomedical Engineering of the  
551 School of Medicine, The University of North Carolina at Chapel Hill, Chapel Hill, North Carolina  
552 27599-7575, USA.; 2003 Jan;14(1):76--82.
- 553 26. Jaimes R, Walton RD, Pasdois PLC, Bernus O, Efimov IR, Kay MW. A Technical Review of  
554 Optical Mapping of Intracellular Calcium within Myocardial Tissue. Am J Physiol Heart Circ  
555 Physiol. 2016 Mar 25;ajpheart.00665.2015.
- 556 27. Yamanaka T, Arafune T, Shibata N, Honjo H, Kamiya K, Kodama I, et al. Single camera system

- for multi-wavelength fluorescent imaging in the heart. In: Proceedings of the Annual International Conference of the IEEE Engineering in Medicine and Biology Society, EMBS. IEEE; 2012. p. 3716–9.
28. Lee P, Yan P, Ewart P, Kohl P, Loew LM, Bollensdorff C. Simultaneous measurement and modulation of multiple physiological parameters in the isolated heart using optical techniques. *Pflügers Arch Eur J Physiol*. 2012 Aug;
29. Lee P, Taghavi F, Yan P, Ewart P, Ashley EA, Loew LM, et al. In situ optical mapping of voltage and calcium in the heart. *PLoS One*. 2012;7.
30. Vogt CC, Bruegmann T, Malan D, Ottersbach A, Roell W, Fleischmann BK, et al. Systemic gene transfer enables optogenetic pacing of mouse hearts. *Cardiovasc Res*. 2015 May 1;106(2):338–43.
31. Bruegmann T, Malan D, Hesse M, Beiert T, Fuegemann CJ, Fleischmann BK, et al. Optogenetic control of heart muscle in vitro and in vivo. *Nat Methods*. 2010 Nov;7(11):897–900.
32. Ambrosi CM, Sadananda G, Klimas A, Entcheva E. Adeno-associated virus mediated gene delivery: Implications for scalable in vitro and in vivo cardiac optogenetic models. *bioRxiv*. Cold Spring Harbor Laboratory; 2017 Aug 31;183319.
33. Matiukas A, Mitrea BG, Pertsov AM, Wuskell JP, Wei M, Watras J, et al. New near-infrared optical probes of cardiac electrical activity. *Am J Physiol Heart Circ Physiol*. 2006 Jun;290(6):H2633-43.
34. Matiukas A, Mitrea BG, Qin M, Pertsov AM, Shvedko AG, Warren MD, et al. Near-infrared voltage-sensitive fluorescent dyes optimized for optical mapping in blood-perfused myocardium. *Heart Rhythm*. Department of Pharmacology, State University of New York, Upstate Medical University, Syracuse, New York 13210, USA.: NIH Public Access; 2007 Nov;4(11):1441–51.
35. Escobar AL, Ribeiro-Costa R, Villalba-Galea C, Zoghbi ME, Pérez CG, Mejía-Alvarez R. Developmental changes of intracellular Ca<sup>2+</sup> transients in beating rat hearts. *Am J Physiol Heart Circ Physiol*. American Physiological Society; 2004 Mar 1;286(3):H971-8.
36. Fauconnier J, Bedut S, Le Guennec J-Y, Babuty D, Richard S. Ca<sup>2+</sup> current-mediated regulation of action potential by pacing rate in rat ventricular myocytes. *Cardiovasc Res*. Oxford University Press; 2003 Mar 1;57(3):670–80.
37. Laughner JI, Ng FS, Sulkin MS, Arthur RM, Efimov IR. Processing and analysis of cardiac optical mapping data obtained with potentiometric dyes. *Am J Physiol Circ Physiol*. Department of Biomedical Engineering, Washington University in Saint Louis, Saint Louis, MO 63130-4899, USA.; 2012 Oct;303(7):H753-65.
38. Gillum N, Karabekian Z, Swift LMM, Brown RPP, Kay MWW, Sarvazyan N. Clinically relevant concentrations of di (2-ethylhexyl) phthalate (DEHP) uncouple cardiac syncytium. *Toxicol Appl Pharmacol*. Pharmacology and Physiology Department, The George Washington University,

- 2300 Eye Street, Washington, DC 20037, USA.; 2009 Apr;236(1):25–38.
39. Kaese S, Verheule S. Cardiac electrophysiology in mice: a matter of size. *Front Physiol.* 2012 Jan;3:345.
40. Wilson LD, Rosenbaum DS. Mechanisms of arrhythmogenic cardiac alternans. *Europace.* 2007 Nov;9(Supplement 6):vi77-vi82.
41. Sato D, Shiferaw Y, Garfinkel A, Weiss JN, Qu Z, Karma A. Spatially discordant alternans in cardiac tissue: role of calcium cycling. *Circ Res. American Heart Association, Inc.;* 2006 Sep;99(5):520–7.
42. Qu Z, Xie Y, Garfinkel A, Weiss JN. T-wave alternans and arrhythmogenesis in cardiac diseases. *Front Physiol.* 2010 Jan;1:154.
43. Garfinkel A. Eight (or more) kinds of alternans. *J Electrocardiol. NIH Public Access;* 2007;40(6 Suppl):S70-4.
44. Uzelac I, Ji YC, Hornung D, Schröder-Scheteling J, Luther S, Gray RA, et al. Simultaneous Quantification of Spatially Discordant Alternans in Voltage and Intracellular Calcium in Langendorff-Perfused Rabbit Hearts and Inconsistencies with Models of Cardiac Action Potentials and Ca Transients. *Front Physiol. Frontiers Media SA;* 2017;8:819.
45. Chudin E, Goldhaber J, Garfinkel A, Weiss J, Kogan B. Intracellular Ca(2+) dynamics and the stability of ventricular tachycardia. *Biophys J.* 1999 Dec;77(6):2930–41.
46. Gloschat C, Aras K, Gupta S, Faye NR, Zhang H, Syunyaev RA, et al. RHYTHM: An Open Source Imaging Toolkit for Cardiac Panoramic Optical Mapping. *Sci Rep.* 2018 Dec;8(1):2921.
47. Kay MW, Amison PM, Rogers JM. Three-dimensional surface reconstruction and panoramic optical mapping of large hearts. *IEEE Trans Biomed Eng. Department of Biomedical Engineering, University of Alabama at Birmingham, Birmingham, AL 35294-0019, USA.* mwk@crml.uab.edu; 2004 Jul;51(7):1219–29.
48. Lou Q, Ripplinger CM, Bayly P V, Efimov IR. Quantitative panoramic imaging of epicardial electrical activity. *Ann Biomed Eng.* 2008 Oct;36(10):1649–58.
49. Jaimes R, Kuzmiak-Glancy S, Brooks D, Swift LM, Posnack NG, Kay MW. Functional response of the isolated, perfused normoxic heart to pyruvate dehydrogenase activation by dichloroacetate and pyruvate. *Pflügers Arch - Eur J Physiol.* 2016 Jul;468(1):131–42.
50. Posnack NG, Jaimes R, Asfour H, Swift LMLM, Wengrowski AMAM, Sarvazyan N, et al. Bisphenol A Exposure and Cardiac Electrical Conduction in Excised Rat Hearts. *Environ Health Perspect.* 2014 Jan;122(4):384–90.
51. Swift LMLM, Asfour H, Posnack NG, Arutunyan A, Kay MWMW, Sarvazyan N. Properties of blebbistatin for cardiac optical mapping and other imaging applications. *Pflügers Arch Eur J Physiol.* 2012 Sep;464(5):503–12.
52. Fedorov V V, Lozinsky IT, Sosunov EA, Anyukhovskiy EP, Rosen MR, Balke CW, et al.

*Dual optical mapping*

- Application of blebbistatin as an excitation-contraction uncoupler for electrophysiologic study of rat and rabbit hearts. *Hear Rhythm*. Department of Biomedical Engineering, Washington University, St. Louis, Missouri 63130-4899, USA.; 2007 May;4:619–26.
53. Del Nido PJ, Glynn P, Buenaventura P, Salama G, Koretsky AP. Fluorescence measurement of calcium transients in perfused rabbit heart using rhod 2. *Am J Physiol*. Department of Cardiac Surgery, Harvard Medical School, Boston, Massachusetts 02115, USA.; 1998 Feb;274(2 Pt 2):H728--41.
54. Edelstein AD, Tsuchida MA, Amodaj N, Pinkard H, Vale RD, Stuurman N. Advanced methods of microscope control using  $\mu$ Manager software. *J Biol Methods*. 2014 Nov 7;1(2):10.
55. Posnack NGNG, Idrees R, Ding H, Jaimes Iii R, Stybayeva G, Karabekian Z, et al. Exposure to phthalates affects calcium handling and intercellular connectivity of human stem cell-derived cardiomyocytes. *PLoS One*. 2015 Jan;10(3):e0121927–e0121927.
56. Ramadan M, Sherman M, Jaimes R, Chaluvadi A, Swift L, Posnack NG. Disruption of neonatal cardiomyocyte physiology following exposure to bisphenol-a. *Sci Rep*. 2018;8(1).
57. Doshi AN, Walton RD, Krul SP, de Groot JR, Bernus O, Efimov IR, et al. Feasibility of a semi-automated method for cardiac conduction velocity analysis of high-resolution activation maps. *Comput Biol Med*. 2015;65:177–83.
58. Hunter JD. Matplotlib: A 2D Graphics Environment. *Comput Sci Eng*. 2007;9(3):90–5.
59. Lee P, Calvo CJ, Alfonso-Almazán JM, Quintanilla JG, Chorro FJ, Yan P, et al. Low-Cost Optical Mapping Systems for Panoramic Imaging of Complex Arrhythmias and Drug-Action in Translational Heart Models. *Sci Rep*. Nature Publishing Group; 2017 Feb;7:43217.

## FIGURE LEGENDS

**Figure 1: Overview of the optical design and workflow.** (A) Optical system configuration with image splitting device positioned in front of a sCMOS camera (Zyla 4.2 PLUS, Andor Technologies), (B) Emission of each complementary probe (Vm, Ca) is separated by wavelength using an image splitting device (C) Dichroic cube setup with the two emission filters and a dichroic mirror. (D) Experimental workflow includes image acquisition, followed by signal processing using a custom MATLAB script or image processing in Rhythm(37) and conduction velocity analysis in ORCA(57). Vm = transmembrane voltage, Ca = intracellular calcium signal.

**Figure 2: Optical configuration results in negligible crosstalk between fluorescent probes.** (A) Passbands of all the filters used in the optical configuration. (B) Two sides of a single, large camera sensor display a duplicated ruler image from each emission band with negligible focal shift. (C) Illustration of misaligned (right) and proper alignment (left) of images. (D) i: 800x256 pixel image of a back illuminated ruler is shown before splitting into two 384x256 pixel images; left: long wavelength path (710+nm), middle: black boundary between images (16 pixels), right: short wavelength path (585±20nm). (ii) 800x256 image when the a plate is inserted to block the light path on the left (710+nm). (iii) 800x256 image when the path on the right is blocked (585 ± 20nm). (iiii) Profile traces corresponding to the full image (black), left path blocked (blue, 710+nm) and right path blocked (red, 585±20nm) demonstrate a lack of crosstalk along the light paths. Arrow denotes location of the boundary between images without crosstalk. (E) Left: Detected fluorescence on the epicardial surface after single probe administration (Rhod-2AM). Center: High quality calcium transients through the 585 nm emission filter with no detectable signal through the 710 nm longpass filter. Right: Maximum counts from each channel after Rhod-2AM (only) administration. (F) Left: Detected fluorescence on the epicardial surface after single probe administration (RH237). Center: High quality optical action potentials through the 710 nm emission filter, with minimal signal through the 585 nm emission. Right: Maximum counts from each channel after RH237 (only) administration. Note: Bar plots (E,F) on the right collected from different rat hearts, each loaded with a single fluorescent probe (n = 3 each plot). Scale bar = 1cm.

**Figure 3: Use of ryanodine receptor antagonist to demonstrate signal specificity.** Ryanodine (Ry) administration significantly reduced peak calcium transient amplitudes (A, C), with no effect on optical action potential amplitudes (B, D). Normalized fluorescent signals were used for time measurements. Calcium transient (C, E, G) and action potential (D, F, H) parameters are shown before and 1 minute after ryanodine administration at a pacing frequency of 180 msec cycle length. Mean ± SEM, n=3 juvenile rat hearts.



**Figure 4:** Multiparametric optical signals acquired from Langendorff-perfused rat and piglet hearts. **(A)** Normalized transmembrane voltage (RH237, red) and intracellular calcium (Rhod-2AM, orange) fluorescence signals acquired simultaneously from an excised rat heart during electrical pacing (150, 200, 220 msec pacing cycle length). In this example, each individual image represents 384x256 pixels acquired at 814fps. **(B)** Normalized fluorescence signals acquired simultaneously from excised piglet hearts during electrical pacing (180, 200, 220 msec pacing cycle length). In this specific example, each individual image represents 640x512 pixels acquired at 406fps. Circle denotes region of interest (rat: 45 pixel region, piglet: 80 pixel region in this example). Note: Schneider 17mm f/0.95 lens used for rat hearts, Fujinon 6mm f/1.2 lens used for piglet hearts. Vm = transmembrane voltage, Ca = intracellular calcium signal. ROI = region of interest. Scale bar = 1 cm.

**Figure 5: Spatial filtering of optical signals using box blurring.** The fluorescence intensity of each pixel is averaged with neighboring pixels. **(A-F)** 384x256 pixel images were convolved with an odd uniform kernel for box blurring to improve SNR for isochrone analysis. Salt and pepper noise is decreased with increasing kernel size for both Vm (top) and Ca (bottom) signals. **(G, H)** Traces show increased SNR with increasing kernel size. Note: The displayed signal is measured from a single pixel (ROI = region of interest), whereas typically for signal analysis an averaged region of interest is used consisting of several pixels from images that have not been box blurred. **(I)** Spatial resolution is demonstrated in the raw image (purple), 5x5 box blurred image (red) and 15x15 box blurred image (blue). Corresponding edge profile trace illustrates spatial resolution of approximately 0.8mm (raw, 5x5 box blurring), 0.86mm (9x9 box blurring) to 1.2mm (15x15 box blurring). Scale bar = 1cm

**Figure 6: Images from simultaneous acquisition of voltage and calcium signals.** **(A)** Voltage isochronal map. **(B)** Calcium isochronal map. **(C)** Voltage and calcium upstrokes display anatomical differences in excitation-contraction coupling (apex versus base). **(D)** Transverse (T) and longitudinal (L) conduction velocity computed from voltage and calcium wavefront propagation. Longitudinal propagation velocity of the calcium wavefront was significantly slower than the voltage conduction velocity (t-test,  $p < 0.001$ ). Slower calcium conduction velocities coincide with increased lag time between the action potential and calcium transient near the base of the heart. Conduction velocity was calculated from 6 angles for transverse and 2 angles for longitudinal measurements. **(E)** Sequential images of impulse propagation show the voltage wavefront originating from the pacing electrode (arrow) and propagating toward the base. Spatial heterogeneity was observed in the activation and repolarization pattern at  $t = 40$  msec **(B)** Sequential images of the calcium wavefront follows the voltage wavefront, with an example of folding observed at  $t = 40$  msec. Arrows denote pacing electrode; Vm = transmembrane voltage, Ca = intracellular calcium signal. Scale bar = 1cm

724

725 **Figure 7: Simultaneous calcium and voltage imaging during ventricular tachycardia. (A)** T-wave  
 726 alternans (arrows) on alternating waveforms recording from an isolated, intact heart. **(B, C)** APD30 map  
 727 shows repolarization heterogeneity during an odd “O” and even “E” beats. **(D,E)** CaD30 signals also  
 728 show reuptake heterogeneity across the epicardial surface during odd and even beats. Optical action  
 729 potentials and calcium transients display alternans that can be in-phase **(F)** or out-of-phase **(G)**. In-  
 730 phase alternans are represented by a small calcium transient amplitude following a shortened action  
 731 potential duration. Out-of-phase alternans describe a tall calcium transient amplitude that follows a  
 732 shortened action potential duration. APD30 = Action potential duration at 30% repolarization; CaD30 =  
 733 Calcium transient duration at 30% relaxation; R1 & R2 = regions of interest; Vm = transmembrane  
 734 voltage; Ca = intracellular calcium signal. Scale bar = 1cm

735

736 **TABLES**

737

738 **Table 1:** Optical mapping experiments employing a single sensor design.

| REFERENCE                        | Jaimes et al. (2019)*                                            | Lee et al. (2011)                                      | Bachtel et al. (2011)                                                                | Yamanaka et al. (2012)                                                               | Scull et al. (2012)                                                                              |
|----------------------------------|------------------------------------------------------------------|--------------------------------------------------------|--------------------------------------------------------------------------------------|--------------------------------------------------------------------------------------|--------------------------------------------------------------------------------------------------|
| DYES USED                        | Rhod-2 and RH237                                                 | Fura-2 and Di-4-ANBDQPPQ                               | Di-4-ANEPPS                                                                          | Rhod-2 and RH237                                                                     | X-Rhod-1 and Di-4-ANEPPS                                                                         |
| BIOLOGICAL SAMPLE                | Isolated heart                                                   | Isolated heart                                         | Isolated heart                                                                       | Isolated heart                                                                       | Cell monolayer                                                                                   |
| NO. OF PIXELS                    | 256 x 384                                                        | 64 x 64                                                | 128 x 64                                                                             | 512 x 512                                                                            | 504 bundled optical fibers and PDA                                                               |
| EFFECTIVE FRAME RATE PER CHANNEL | 814                                                              | 465 (variable)                                         | 375                                                                                  | 125                                                                                  | 488.3                                                                                            |
| SIGNAL-TO-NOISE                  | ~12                                                              | 50-200                                                 | 5.8                                                                                  | NA                                                                                   | 21                                                                                               |
| NECESSARY HARDWARE               | Single, constant wavelength light-source. Path splitter required | Four wavelength LEDs with custom-built microcontroller | Blue and cyan LEDs mounted on PCBs, custom hardware and software for rapid switching | LED ring light consisting of blue and yellow LEDs                                    | Dual wavelength LED matrix, custom passband filter, A/D triggering board, custom LabVIEW program |
| KEY DIFFERENCES                  | Simultaneous imaging of Vm and Ca, off-the-shelf components      | Interleaved, Ratiometric Vm and ratiometric Ca         | Sequential imaging, Ratiometric Vm measurements only                                 | Sequential imaging, Emission filter wheel, allows for more possible dye combinations | Sequential imaging, Crosstalk reduction algorithm                                                |

\*note: calculated signal-to-noise ratio measurements are listed in Supplemental Table 2

739

740

741

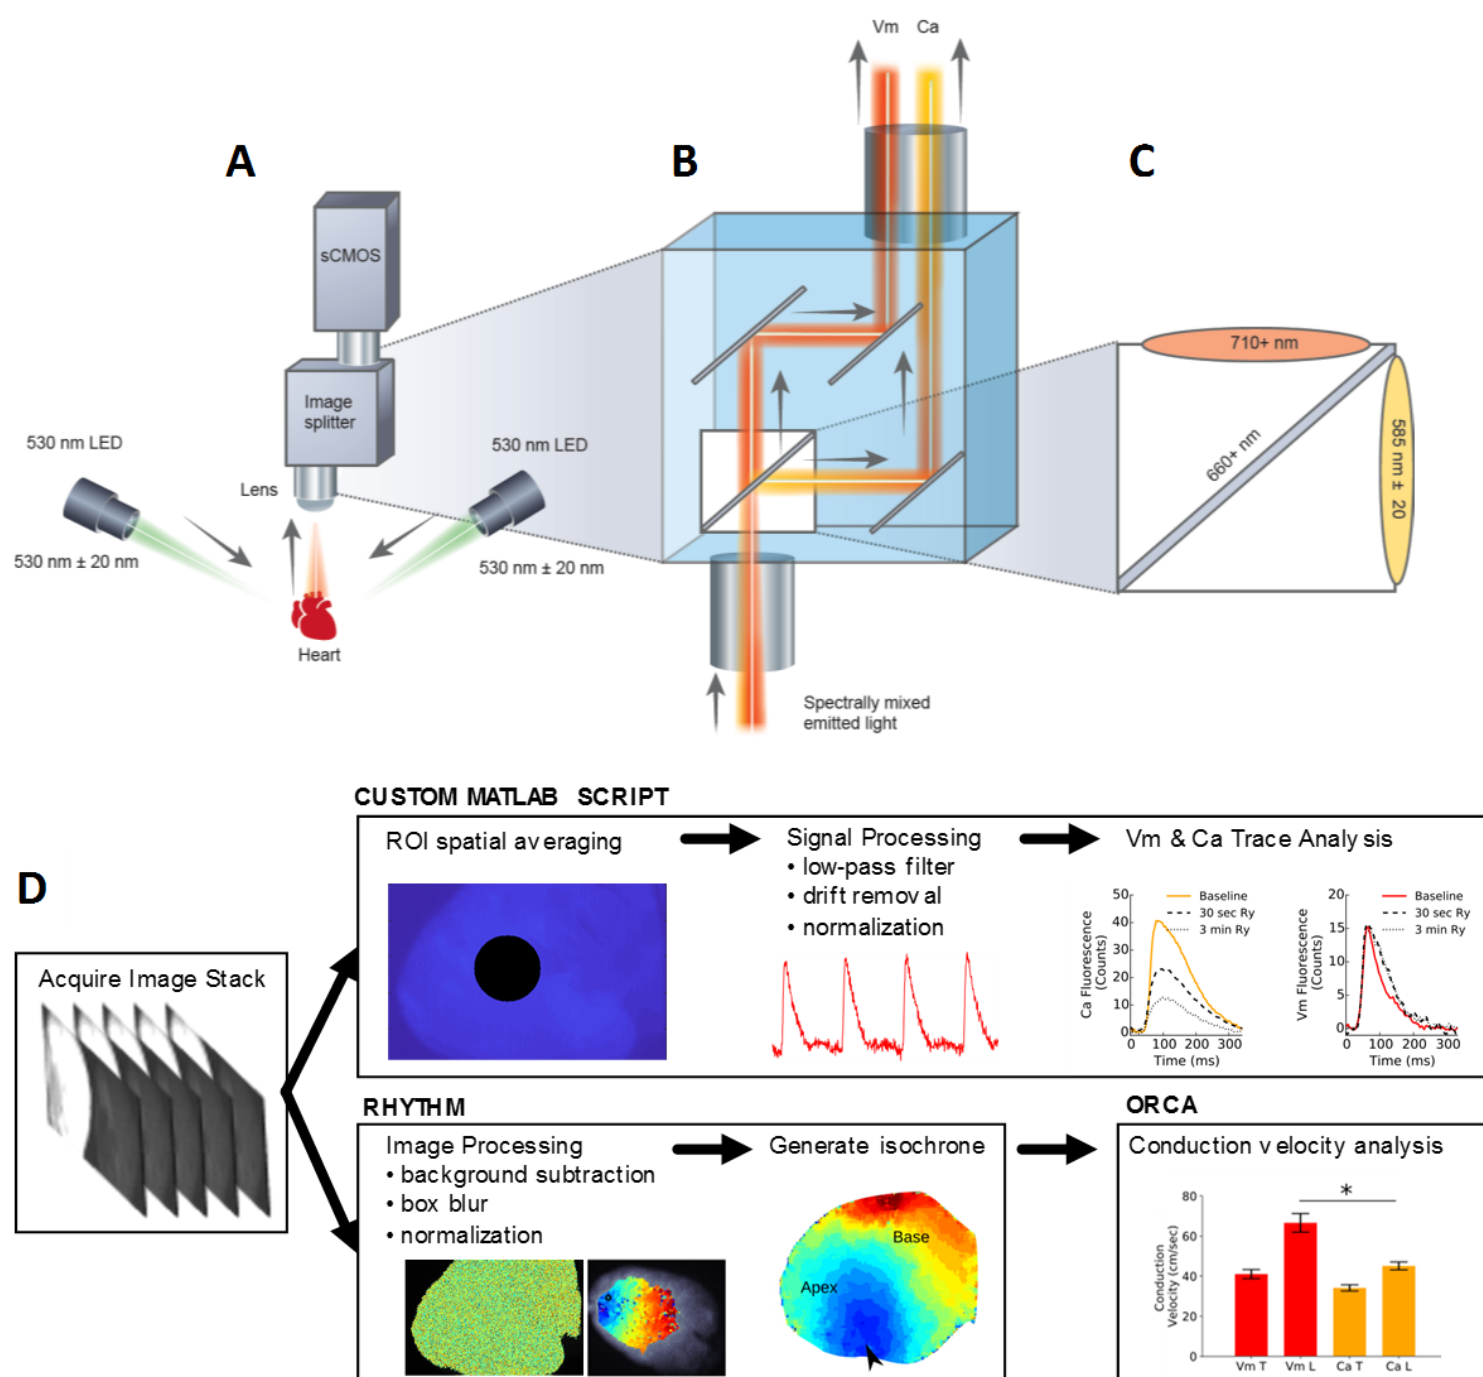

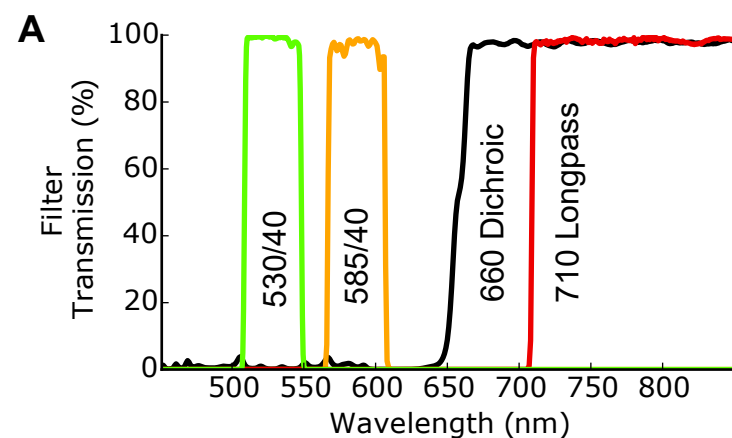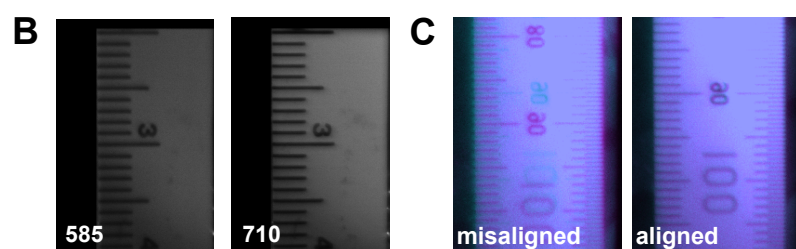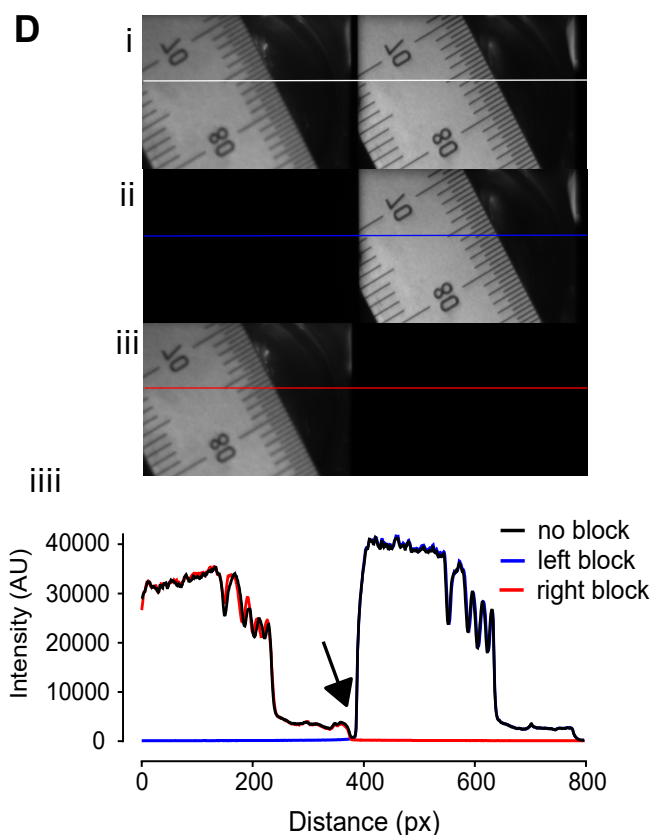

**E Rhod-2 Staining Only**

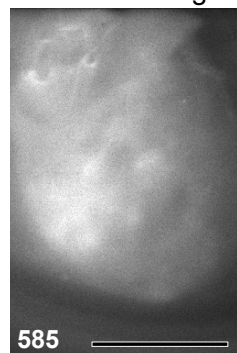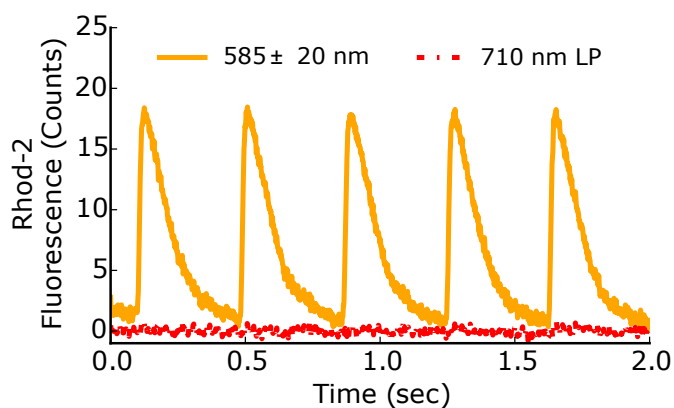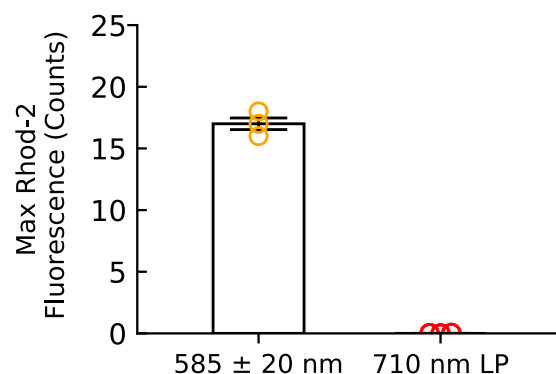

**F RH327 Staining Only**

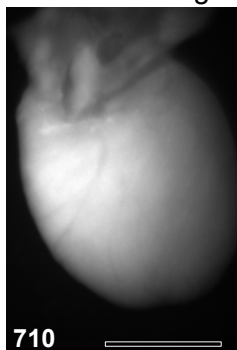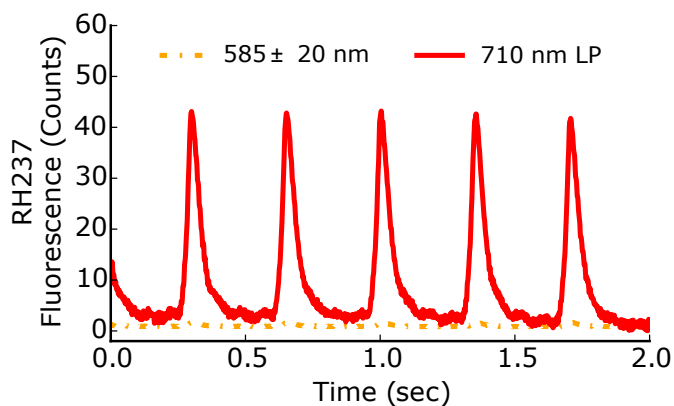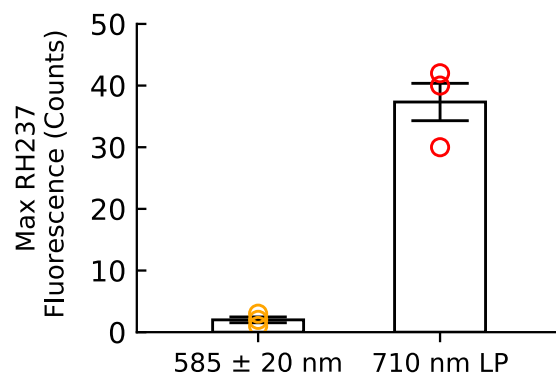

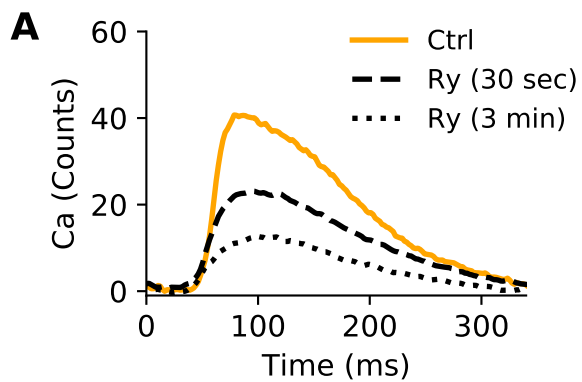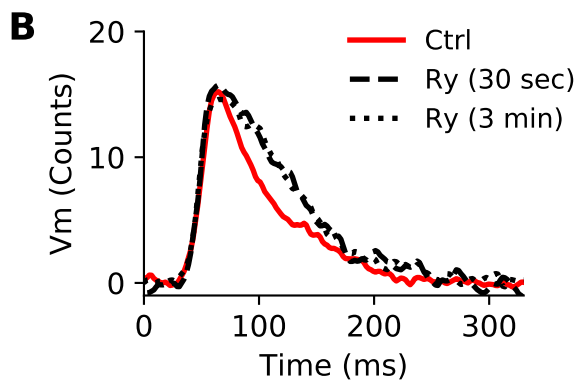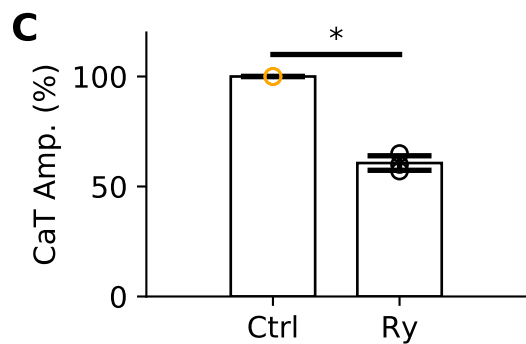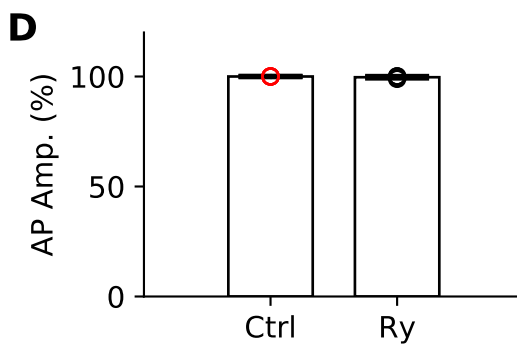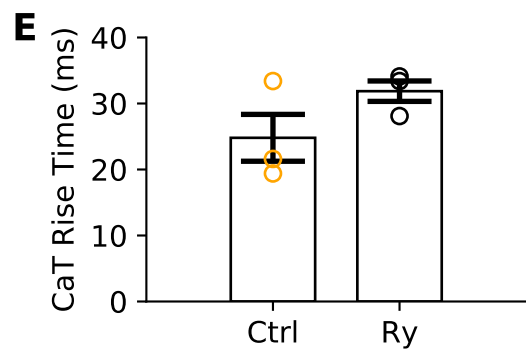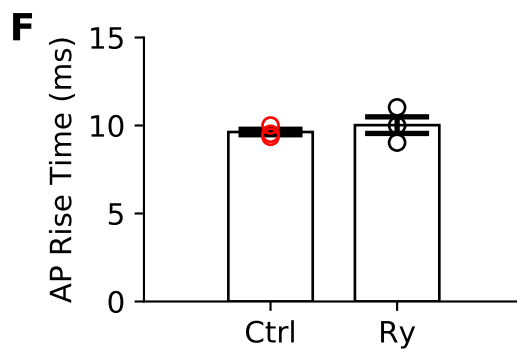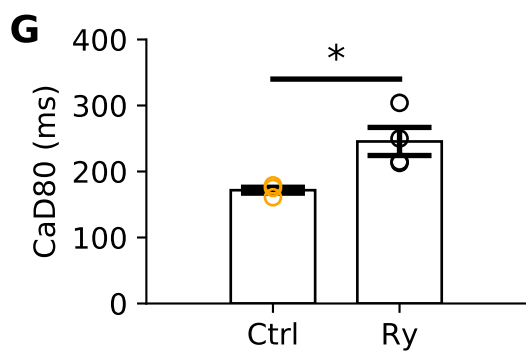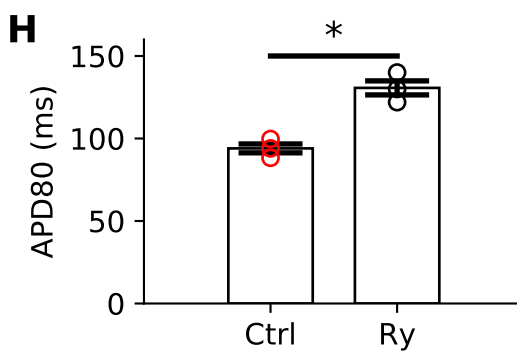



**A****Rat, Vm**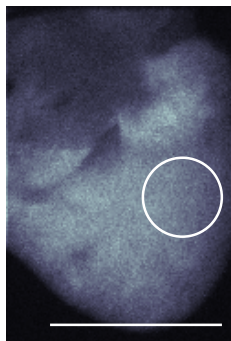**PCL: 150 ms**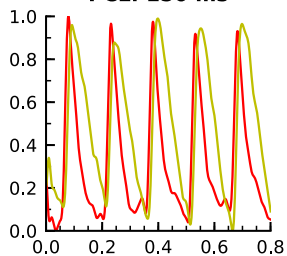**PCL: 200 ms**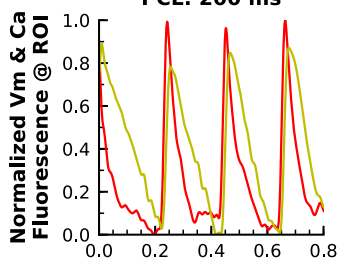**Rat, Ca**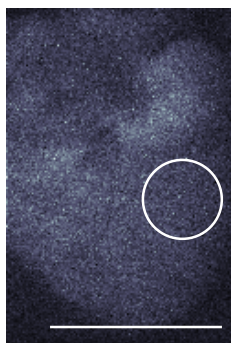**PCL: 220 ms**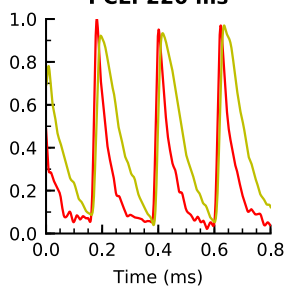**B****Pig, Vm**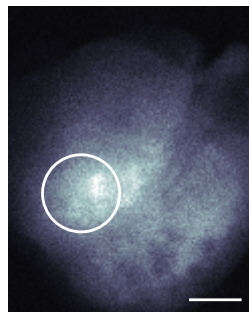**PCL: 180 ms**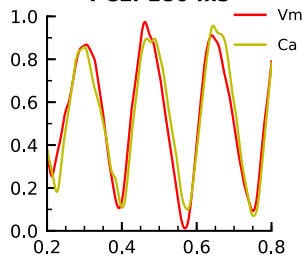**PCL: 200 ms**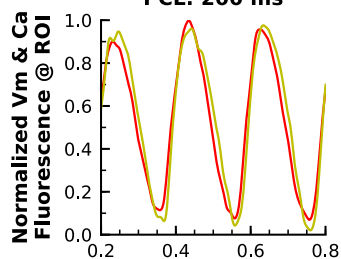**Pig, Ca**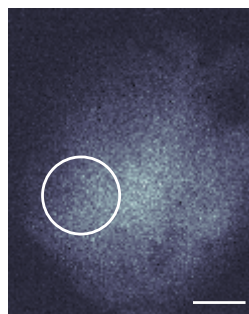**PCL: 220 ms**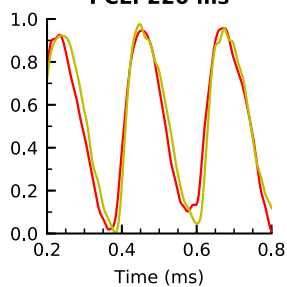

**A** Vm, 5x5 Box Blur

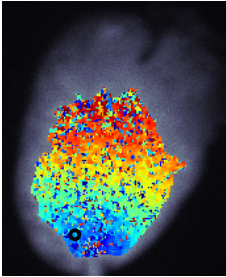

**C** Vm, 9x9 Box Blur

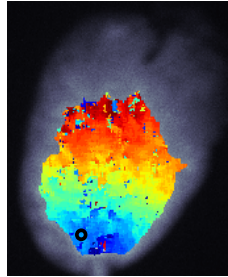

**E** Vm, 15x15 Box Blur

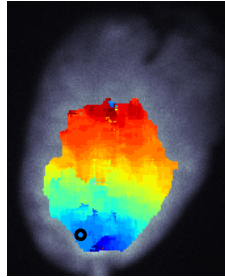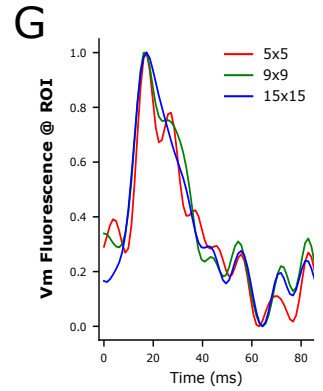

**B** Ca, 5x5 Box Blur

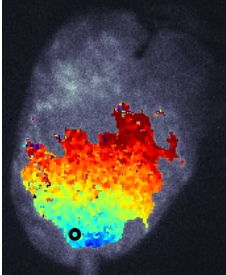

**D** Ca, 9x9 Box Blur

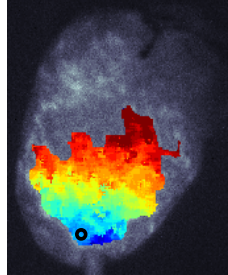

**F** Ca, 15x15 Box Blur

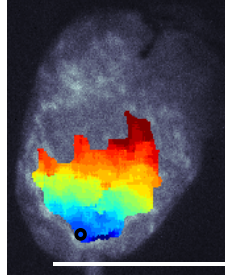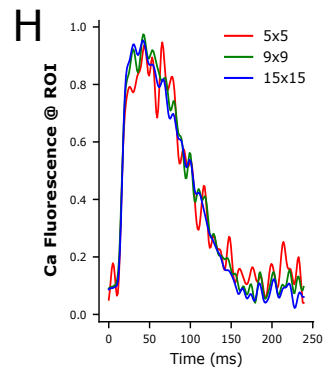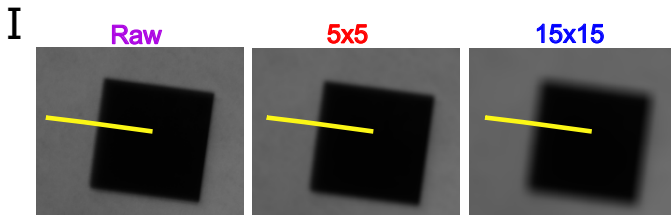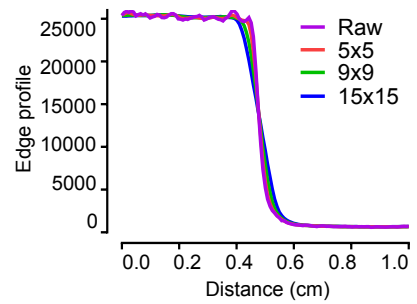

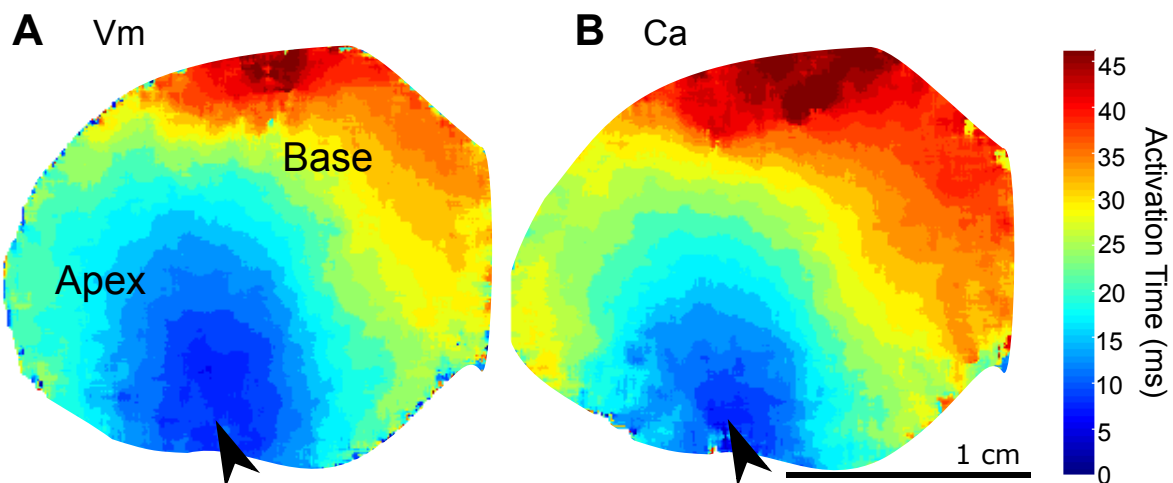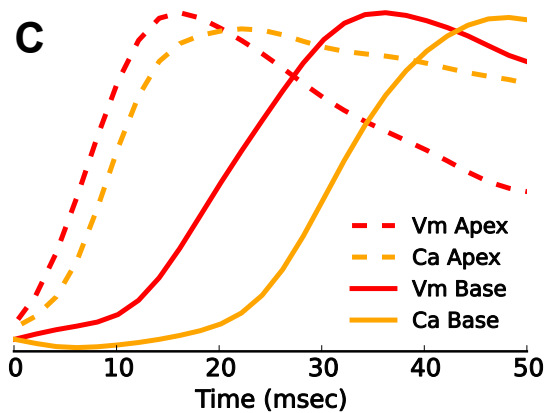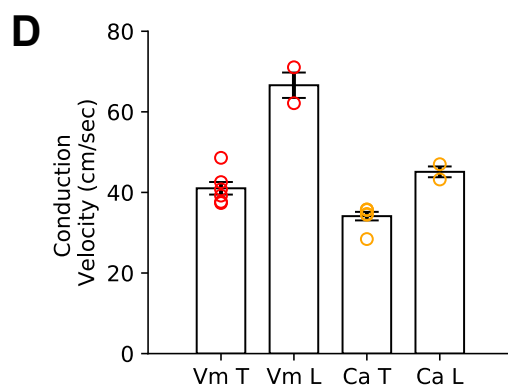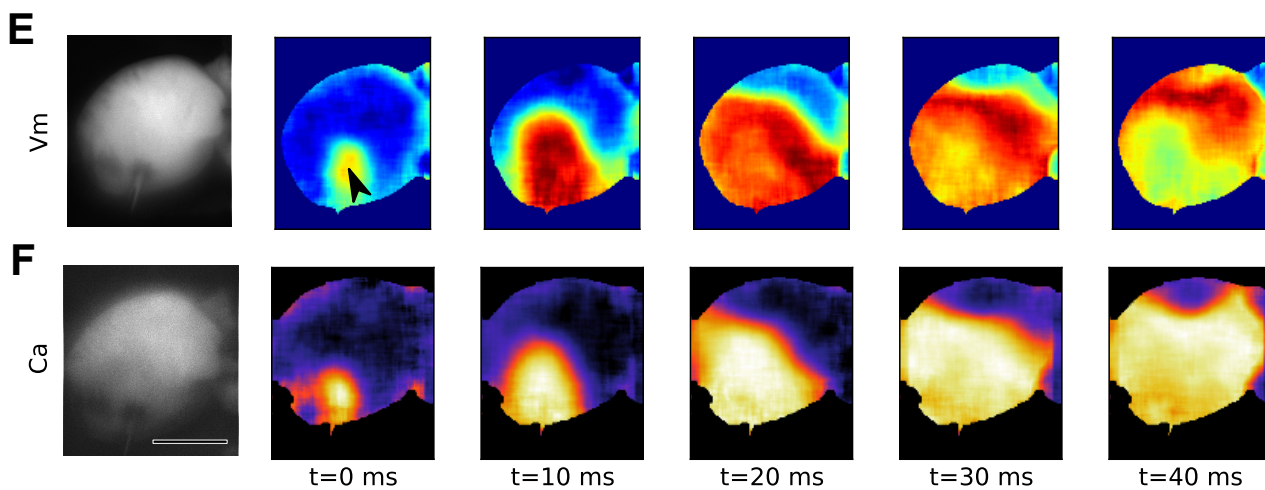

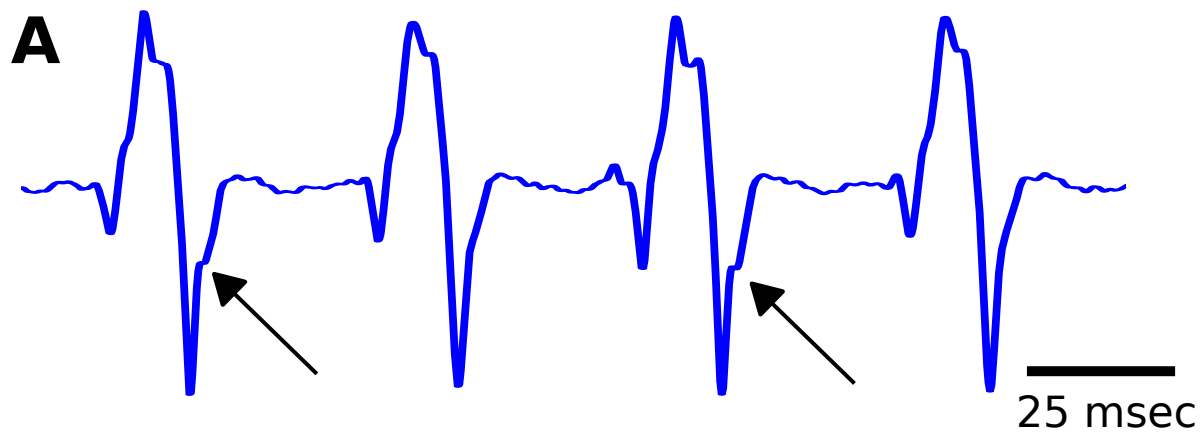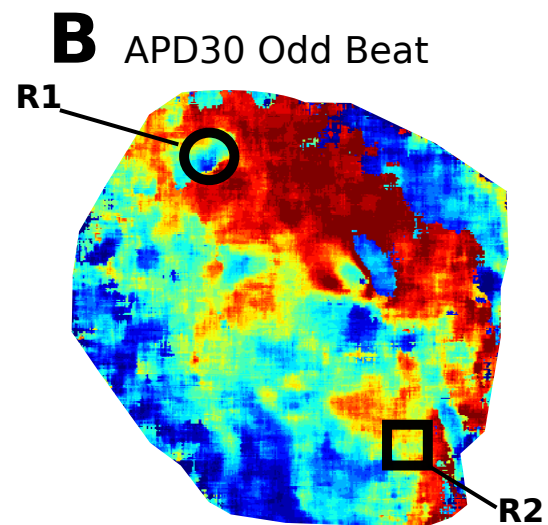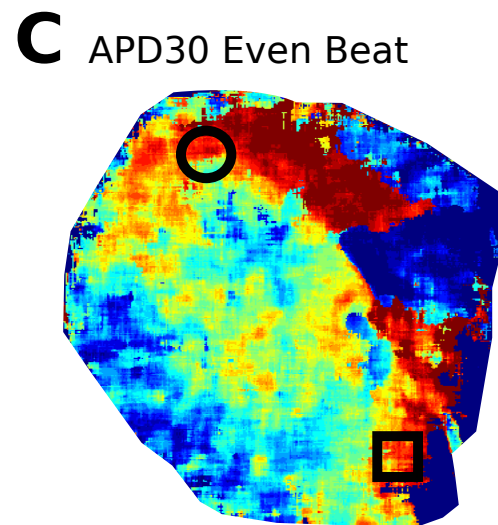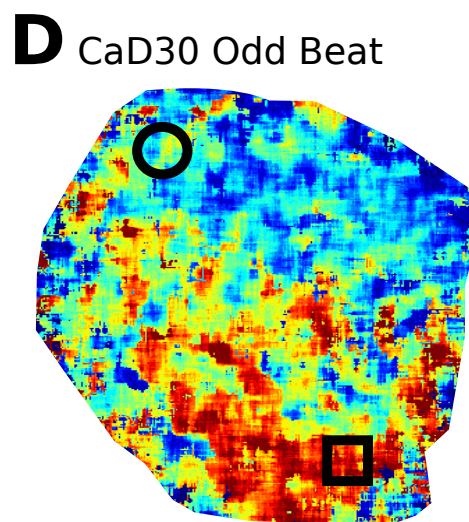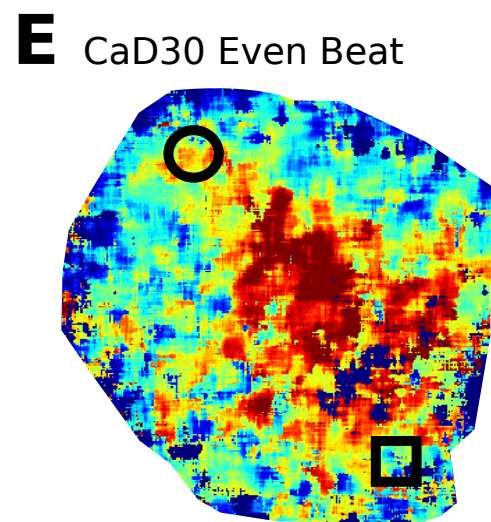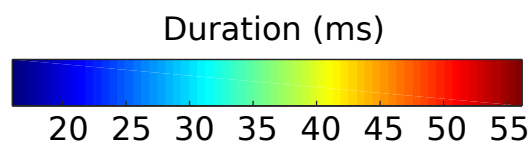

**F** R1 (In-Phase)

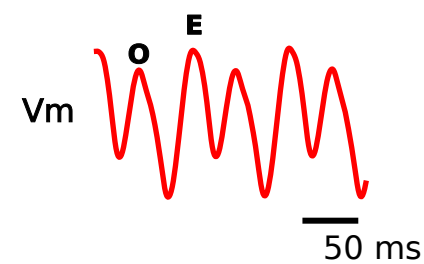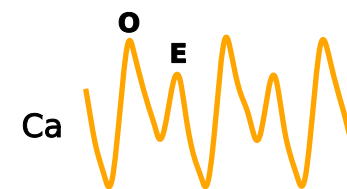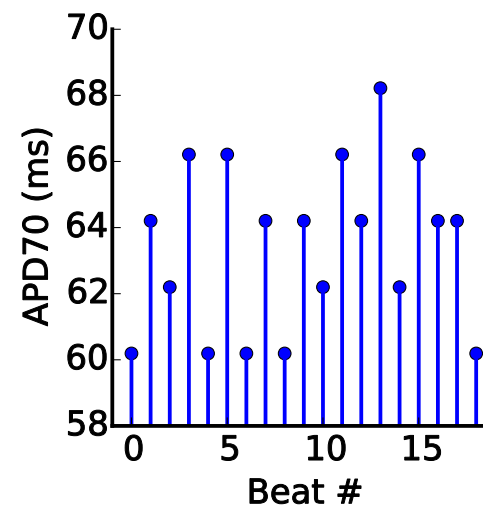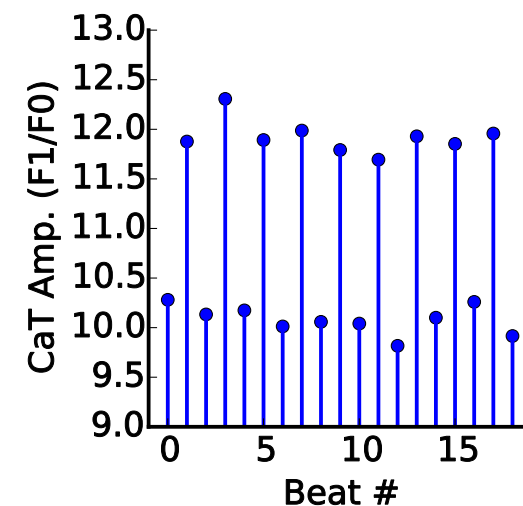

**G** R2 (Out-of-Phase)

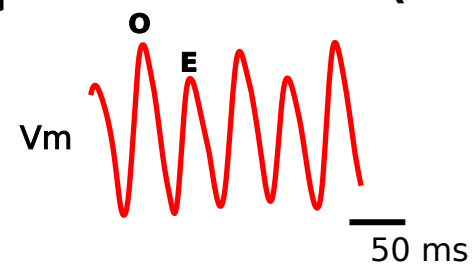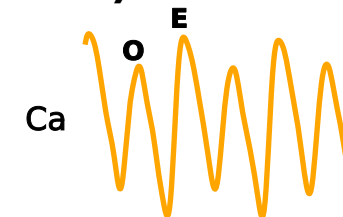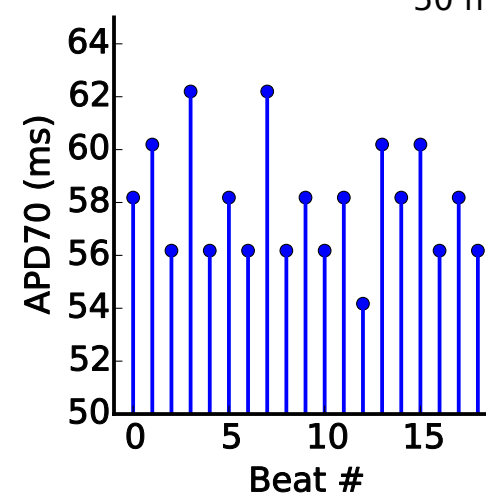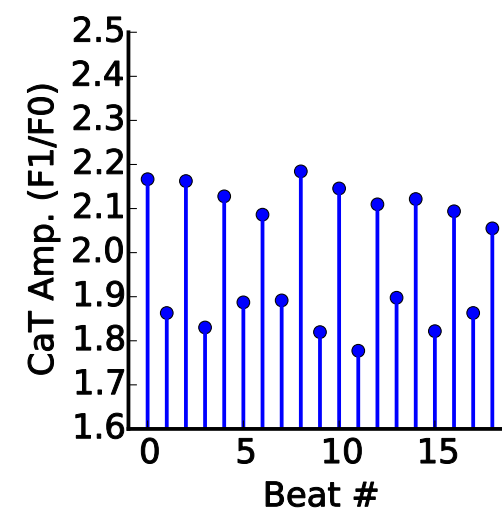

Source: https://www.biorxiv.org/content/10.1101/651380v1.full.pdf
